# Supplementary material for: The Mechanism of Houttuynia cordata Embryotoxicity Was Explored in Combination with an Experimental Model and Network Pharmacology
Source: MDPI journal article supplement (doi:10.3390/toxins15010073), 2023-01-13
Supplement: s1 [file s1]

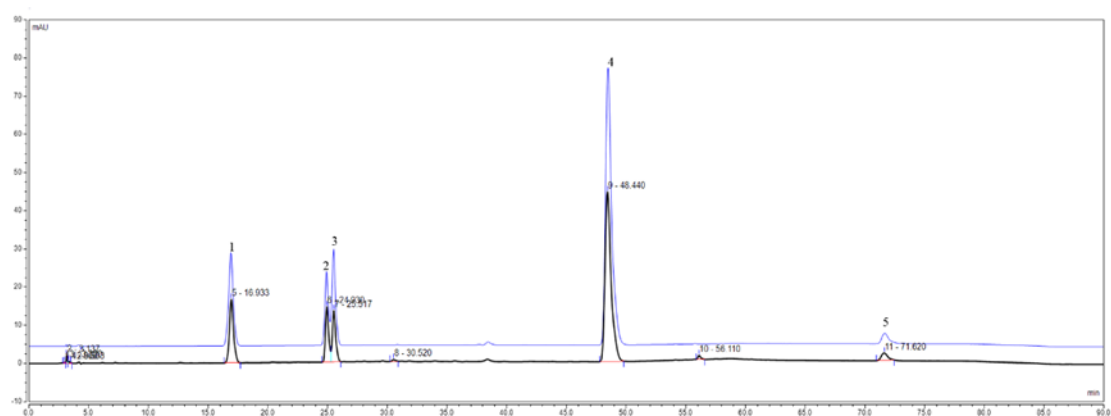

**Figure S1:** HPLC fingerprint of the aqueous extract of *H.cordata*. Peak 1: neochlorogenic acid; Peak 2: chlorogenic acid; Peak 3: cryptochlorogenic acid Peak4: Hypericin; Peak5: Quercetin Identification of *H. cordata* extract components by HPLC.
